# Supplementary material for: Determinants of Equity in Coverage of Measles-Containing Vaccines in Wales, UK, during the Elimination Era
Source: MDPI journal article supplement (doi:10.3390/vaccines11030680), 2023-03-17
Supplement: s1 [file s1]

**Supplementary Table S1.** Uptake of one or two doses of measles-containing vaccine in those aged 4 to 25 years alive and resident in Wales as at 31 August 2021, without a vaccine refusal code, by individual characteristics. Univariable Odds Ratios and 95% Confidence Intervals are also presented. Groups with uptake under 95% are indicated with bold text. Analysis is presented for the whole study cohort.

| Characteristic                          | Category                 | One dose of measles-containing vaccine |            |        |                        | Two doses of measles-containing vaccine |            |             |                        |
|-----------------------------------------|--------------------------|----------------------------------------|------------|--------|------------------------|-----------------------------------------|------------|-------------|------------------------|
|                                         |                          | (2 to 25-year-olds)                    |            |        |                        | (4 to 25-year-olds)                     |            |             |                        |
|                                         |                          | Vaccinated                             | Population | Uptake | Odds Ratio<br>(95% CI) | Vaccinated                              | Population | Uptake      | Odds Ratio<br>(95% CI) |
| Gender                                  | Male                     | 322953                                 | 331333     | 97.5   | Baseline               | 288712                                  | 306527     | <b>94.2</b> | Baseline               |
|                                         | Female                   | 305572                                 | 312874     | 97.7   | 1.09 (1.05-1.12)       | 273985                                  | 289294     | <b>94.7</b> | 1.10 (1.08-1.13)       |
| Age cohort                              | Young child (2-3)        | 46734                                  | 48386      | 96.6   | 0.64 (0.61 - 0.68)     | N/a                                     | N/a        |             |                        |
|                                         | Primary school (4-11)    | 220869                                 | 225882     | 97.8   | Baseline               | 213543                                  | 225882     | <b>94.5</b> | Baseline               |
|                                         | Secondary school (12-16) | 141487                                 | 144962     | 97.6   | 0.92 (0.88 - 0.97)     | 137865                                  | 144962     | 95.1        | 1.22 (1.09 - 1.16)     |
|                                         | College (17-18)          | 51925                                  | 53411      | 97.2   | 0.79 (0.75 - 0.84)     | 50353                                   | 53411      | <b>94.3</b> | 0.95 (0.91 - 0.99)     |
|                                         | University (19-21)       | 69204                                  | 71067      | 97.4   | 0.84 (0.80 - 0.89)     | 66689                                   | 71067      | <b>93.8</b> | 0.88 (0.85 - 0.91)     |
|                                         | Young adults (22-25)     | 98306                                  | 100499     | 97.8   | 1.02 (0.97 - 1.07)     | 94247                                   | 100499     | <b>93.8</b> | 0.87 (0.84 - 0.90)     |
| Health board<br>of residence            | HB1                      | 126605                                 | 129008     | 98.1   | Baseline               | 114841                                  | 119559     | 96.1        | Baseline               |
|                                         | HB2                      | 86092                                  | 88675      | 97.1   | 0.63 (0.60-0.67)       | 76489                                   | 81930      | <b>93.4</b> | 0.58 (0.55-0.60)       |
|                                         | HB3                      | 66005                                  | 68067      | 97.0   | 0.61 (0.57-0.64)       | 59104                                   | 63174      | <b>93.6</b> | 0.60 (0.57-0.62)       |
|                                         | HB4                      | 10867                                  | 11157      | 97.4   | 0.71 (0.63-0.81)       | 9776                                    | 10365      | <b>94.3</b> | 0.68 (0.62-0.75)       |
|                                         | HB5                      | 112457                                 | 114820     | 97.9   | 0.90 (0.85-0.96)       | 100300                                  | 106022     | <b>94.6</b> | 0.72 (0.69-0.75)       |
|                                         | HB6                      | 118608                                 | 121427     | 97.7   | 0.80 (0.76-0.84)       | 106272                                  | 112274     | <b>94.7</b> | 0.73 (0.70-0.76)       |
|                                         | HB7                      | 107891                                 | 111053     | 97.2   | 0.65 (0.61-0.68)       | 95915                                   | 102497     | <b>93.6</b> | 0.60 (0.58-0.62)       |
| Urban/rural<br>residence                | Rural                    | 167637                                 | 170966     | 98.1   | Baseline               | 151717                                  | 158769     | 95.6        | Baseline               |
|                                         | Urban                    | 460888                                 | 473241     | 97.4   | 0.74 (0.71-0.77)       | 410980                                  | 437052     | <b>94.0</b> | 0.73 (0.71-0.75)       |
| Deprivation<br>quintile<br>of residence | Most deprived            | 156244                                 | 161365     | 96.8   | Baseline               | 137637                                  | 148583     | <b>92.6</b> | Baseline               |
|                                         | 2                        | 132238                                 | 135455     | 97.6   | 1.35 (1.29-1.41)       | 118200                                  | 125111     | <b>94.5</b> | 1.36 (1.32-1.40)       |
|                                         | 3                        | 114339                                 | 117179     | 97.6   | 1.32 (1.26-1.38)       | 102476                                  | 108317     | <b>94.6</b> | 1.40 (1.35-1.44)       |
|                                         | 4                        | 107384                                 | 109686     | 97.9   | 1.53 (1.45-1.61)       | 96969                                   | 101701     | 95.3        | 1.63 (1.57-1.69)       |
|                                         | Least deprived           | 118320                                 | 120522     | 98.2   | 1.76 (1.67-1.85)       | 107415                                  | 112109     | 95.8        | 1.82 (1.76-1.89)       |

|                                        |                          |        |        |             |                    |        |        |             |                    |
|----------------------------------------|--------------------------|--------|--------|-------------|--------------------|--------|--------|-------------|--------------------|
| Premature birth                        | No                       | 532270 | 539189 | 98.7        | Baseline           | 478081 | 496521 | 96.3        | Baseline           |
|                                        | Yes                      | 42682  | 43235  | 98.7        | 1.00 (0.92-1.10)   | 37967  | 39558  | 96.0        | 0.92 (0.87-0.97)   |
|                                        | Unknown                  | 53573  | 61783  | <b>86.7</b> | -                  | 46649  | 59742  | <b>78.1</b> | -                  |
| Maternal smoker                        | No                       | 151121 | 152720 | 99.0        | Baseline           | 135418 | 139150 | 97.3        | Baseline           |
|                                        | Yes                      | 40463  | 41027  | 98.6        | 0.76 (0.69-0.84)   | 36409  | 38115  | 95.5        | 0.59 (0.55-0.62)   |
|                                        | Unknown                  | 436941 | 450460 | 97.0        | -                  | 390870 | 418556 | <b>93.4</b> | -                  |
| Ethnic group                           | White                    | 512072 | 520137 | 98.4        | Baseline           | 494533 | 516375 | 95.8        | Baseline           |
|                                        | Other                    | 5338   | 6283   | <b>85.0</b> | 0.09 (0.08-0.10)   | 4575   | 6061   | <b>75.5</b> | 0.14 (0.13-0.14)   |
|                                        | Asian                    | 16381  | 17133  | 95.6        | 0.34 (0.32-0.37)   | 15348  | 16820  | <b>91.2</b> | 0.46 (0.44-0.49)   |
|                                        | Mixed                    | 15528  | 16169  | 96.0        | 0.38 (0.35-0.41)   | 14606  | 15953  | <b>91.6</b> | 0.48 (0.45-0.51)   |
|                                        | Unknown                  | 75026  | 79870  | <b>93.9</b> | -                  | 29911  | 36089  | <b>82.9</b> | -                  |
|                                        | Black                    | 4180   | 4615   | <b>90.6</b> | 0.15 (0.14-0.17)   | 3724   | 4523   | <b>82.3</b> | 0.21 (0.19-0.22)   |
| Learning disability                    | No                       | 625181 | 640778 | 97.6        | Baseline           | 559620 | 592455 | <b>94.5</b> | Baseline           |
|                                        | Yes                      | 3344   | 3429   | 97.5        | 0.98 (0.80-1.23)   | 3077   | 3366   | <b>91.4</b> | 0.62 (0.55-0.71)   |
| Sight-loss                             | No                       | 626900 | 642556 | 97.6        | Baseline           | 561160 | 594208 | <b>94.4</b> | Baseline           |
|                                        | Yes                      | 1625   | 1651   | 98.4        | 1.56 (1.08-2.36)   | 1537   | 1613   | 95.3        | 1.19 (0.95-1.51)   |
| Hearing-loss                           | No                       | 587209 | 602418 | 97.5        | Baseline           | 522834 | 554578 | <b>94.3</b> | Baseline           |
|                                        | Yes                      | 41316  | 41789  | 98.9        | 2.26 (2.07-2.48)   | 39863  | 41243  | 96.7        | 1.75 (1.66-1.85)   |
| Co-morbidity score                     | 0                        | 512258 | 526379 | 97.3        | Baseline           | 451772 | 480263 | <b>94.1</b> | Baseline           |
|                                        | 1                        | 106178 | 107558 | 98.7        | 2.12 (2.01-2.24)   | 101423 | 105545 | 96.1        | 1.55 (1.50-1.60)   |
|                                        | 2                        | 7302   | 7425   | 98.3        | 1.64 (1.38-1.97)   | 6857   | 7215   | 95.0        | 1.21 (1.09-1.35)   |
|                                        | 3+                       | 2787   | 2845   | 98.0        | 1.32 (1.03-1.74)   | 2645   | 2798   | <b>94.5</b> | 1.09 (0.93-1.29)   |
| Age first registered with primary care | At birth                 | 511628 | 517554 | 98.9        | Baseline           | 457432 | 473459 | 96.6        | Baseline           |
| GP in Wales                            | Young child (1-3)        | 59968  | 61637  | 97.3        | 0.42 (0.39 - 0.44) | 53622  | 57346  | <b>93.5</b> | 0.50 (0.49 - 0.52) |
|                                        | Primary school (4-11)    | 34937  | 39861  | <b>87.6</b> | 0.08 (0.08 - 0.09) | 31401  | 39861  | <b>78.8</b> | 0.13 (0.13 - 0.13) |
|                                        | Secondary school (12-16) | 7760   | 10172  | <b>76.3</b> | 0.04 (0.04 - 0.04) | 6714   | 10172  | <b>66.0</b> | 0.07 (0.07 - 0.07) |
|                                        | College (17-18)          | 1712   | 2112   | <b>81.1</b> | 0.05 (0.04 - 0.06) | 1539   | 2112   | <b>72.9</b> | 0.09 (0.09 - 0.10) |
|                                        | University (19-21)       | 6903   | 7130   | 96.8        | 0.35 (0.31 - 0.40) | 6598   | 7130   | <b>92.5</b> | 0.43 (0.40 - 0.48) |

|                         |                     |        |        |             |                    |        |        |             |                    |
|-------------------------|---------------------|--------|--------|-------------|--------------------|--------|--------|-------------|--------------------|
|                         | Young adult (22-25) | 5617   | 5741   | 97.8        | 0.52 (0.44 - 0.63) | 5391   | 5741   | <b>93.9</b> | 0.54 (0.48 - 0.60) |
| Mothers age at delivery | Under 17            | 5122   | 5241   | 97.7        | 0.82 (0.68-0.99)   | 4815   | 5114   | <b>94.2</b> | 0.79 (0.70-0.89)   |
|                         | 17-18               | 22763  | 23184  | 98.2        | 1.03 (0.93-1.14)   | 21227  | 22353  | 95.0        | 0.92 (0.86-0.98)   |
|                         | 19-20               | 40786  | 41503  | 98.3        | 1.08 (1.00-1.17)   | 37654  | 39425  | 95.5        | 1.04 (0.99-1.10)   |
|                         | 21-25               | 140031 | 142749 | 98.1        | 0.98 (0.93-1.03)   | 126325 | 133093 | <b>94.9</b> | 0.91 (0.88-0.94)   |
|                         | 26-30               | 179326 | 182735 | 98.1        | Baseline           | 159845 | 167660 | 95.3        | Baseline           |
|                         | 31-35               | 145484 | 148332 | 98.1        | 0.97 (0.92-1.02)   | 129221 | 135264 | 95.5        | 1.05 (1.01-1.08)   |
|                         | 36-40               | 60235  | 61641  | 97.7        | 0.81 (0.77-0.87)   | 53192  | 55981  | 95.0        | 0.93 (0.89-0.97)   |
|                         | Over 40             | 34778  | 38822  | <b>89.6</b> | 0.16 (0.16-0.17)   | 30418  | 36931  | <b>82.4</b> | 0.23 (0.22-0.24)   |
| Birth order             | First born          | 227676 | 229767 | 99.1        | Baseline           | 207864 | 213812 | 97.2        | Baseline           |
|                         | Second born         | 168229 | 170200 | 98.8        | 0.78 (0.74-0.83)   | 150965 | 156332 | 96.6        | 0.80 (0.78-0.84)   |
|                         | Third born          | 68252  | 69437  | 98.3        | 0.53 (0.49-0.57)   | 60870  | 64162  | <b>94.9</b> | 0.53 (0.51-0.55)   |
|                         | Forth born          | 24167  | 24831  | 97.3        | 0.33 (0.31-0.37)   | 21154  | 22873  | <b>92.5</b> | 0.35 (0.33-0.37)   |
|                         | Fifth born          | 8518   | 8851   | 96.2        | 0.23 (0.21-0.26)   | 7357   | 8132   | <b>90.5</b> | 0.27 (0.25-0.29)   |
|                         | Sixth or more       | 5487   | 5804   | <b>94.5</b> | 0.16 (0.14-0.18)   | 4640   | 5270   | <b>88.0</b> | 0.21 (0.19-0.23)   |
|                         | Unknown             | 126196 | 135317 | <b>93.3</b> | -                  | 109847 | 125240 | <b>87.7</b> | -                  |
| Recorded language       | No                  | 8173   | 9147   | <b>89.4</b> | Baseline           | 7271   | 8961   | <b>81.1</b> | Baseline           |
| English or Welsh        | Yes                 | 582599 | 590815 | 98.6        | 8.45 (7.88-9.06)   | 523439 | 544991 | 96.0        | 5.65 (5.34-5.96)   |
|                         | Unknown             | 37753  | 44245  | <b>85.3</b> | -                  | 31987  | 41869  | <b>76.4</b> | -                  |
| Total primary           | None                | 59987  | 63848  | 94.0        | Baseline           | 53951  | 61281  | <b>88.0</b> | Baseline           |
| care GP visits          | 1-2                 | 164529 | 168730 | 97.5        | 2.52 (2.41-2.64)   | 152549 | 160991 | <b>94.8</b> | 2.46 (2.38-2.54)   |
| 01/09/2020 to           | 3-4                 | 111531 | 114098 | 97.8        | 2.80 (2.66-2.94)   | 99485  | 104731 | 95.0        | 2.58 (2.48-2.67)   |
| 31/08/2021              | 5-9                 | 144593 | 147332 | 98.1        | 3.40 (3.23-3.57)   | 124742 | 130716 | 95.4        | 2.84 (2.74-2.94)   |
|                         | 10-14               | 62750  | 63755  | 98.4        | 4.02 (3.75-4.31)   | 54474  | 56957  | 95.6        | 2.98 (2.84-3.12)   |
|                         | 15-19               | 34843  | 35345  | 98.6        | 4.47 (4.07-4.91)   | 31167  | 32544  | 95.8        | 3.08 (2.90-3.26)   |
|                         | 20-24               | 19818  | 20119  | 98.5        | 4.24 (3.77-4.78)   | 18062  | 18897  | 95.6        | 2.94 (2.73-3.17)   |
|                         | 25-49               | 27023  | 27458  | 98.4        | 4.00 (3.62-4.43)   | 25036  | 26294  | 95.2        | 2.70 (2.54-2.88)   |
|                         | 50+                 | 3451   | 3522   | 98.0        | 3.13 (2.49-4.00)   | 3231   | 3410   | <b>94.8</b> | 2.45 (2.11-2.87)   |

|                                        |                          |        |        |             |                  |        |        |             |                  |
|----------------------------------------|--------------------------|--------|--------|-------------|------------------|--------|--------|-------------|------------------|
| Ever eligible for<br>free school meals | No                       | 375348 | 381941 | 98.3        | Baseline         | 366499 | 381941 | 96.0        | Baseline         |
|                                        | Yes                      | 168934 | 172397 | 98.0        | 0.86 (0.82-0.89) | 162129 | 172397 | <b>94.0</b> | 0.67 (0.65-0.68) |
|                                        | Too young                | 46734  | 48386  | 96.6        | -                | N/a    | N/a    | N/a         | -                |
|                                        | Unknown                  | 37509  | 41483  | <b>90.4</b> | -                | 34069  | 41483  | <b>82.1</b> | -                |
| Ever attended a<br>special school      | No                       | 537716 | 547626 | 98.2        | Baseline         | 522515 | 547626 | 95.4        | Baseline         |
|                                        | Yes                      | 6566   | 6712   | 97.8        | 0.83 (0.71-0.98) | 6113   | 6712   | <b>91.1</b> | 0.49 (0.45-0.53) |
|                                        | Too young                | 46734  | 48386  | 96.6        | -                | N/a    | N/a    | N/a         | -                |
|                                        | Unknown                  | 37509  | 41483  | <b>90.4</b> | -                | 34069  | 41483  | <b>82.1</b> | -                |
| Ever excluded<br>from school           | No                       | 514916 | 524387 | 98.2        | Baseline         | 500456 | 524387 | 95.4        | Baseline         |
|                                        | Yes                      | 29365  | 29950  | 98.0        | 0.92 (0.85-1.01) | 28171  | 29950  | <b>94.1</b> | 0.76 (0.72-0.80) |
|                                        | Too young                | 46734  | 48386  | 96.6        | -                | N/a    | N/a    | N/a         | -                |
|                                        | Unknown                  | 37510  | 41484  | <b>90.4</b> | -                | 34070  | 41484  | <b>82.1</b> | -                |
| UK Born                                | Yes                      | 585022 | 592771 | 98.7        | Baseline         | 525993 | 546671 | 96.2        | Baseline         |
|                                        | No                       | 8044   | 9611   | <b>83.7</b> | 0.07 (0.06-0.07) | 6679   | 9434   | <b>70.8</b> | 0.10 (0.09-0.10) |
|                                        | Unknown                  | 35459  | 41825  | <b>84.8</b> | -                | 30025  | 39716  | <b>75.6</b> | -                |
| Mothers highest<br>qualification       | None                     | 67273  | 68404  | 98.3        | Baseline         | 62218  | 65702  | <b>94.7</b> | Baseline         |
|                                        | A-levels                 | 74917  | 75607  | 99.1        | 1.83 (1.66-2.01) | 68504  | 70398  | 97.3        | 2.03 (1.91-2.14) |
|                                        | GCSE/O-Level high grades | 99175  | 100106 | 99.1        | 1.79 (1.64-1.95) | 91236  | 93988  | 97.1        | 1.86 (1.76-1.95) |
|                                        | GCSE/O-Level any grades  | 86051  | 87030  | 98.9        | 1.48 (1.36-1.61) | 79594  | 82565  | 96.4        | 1.50 (1.43-1.58) |
|                                        | Unknown                  | 144762 | 154892 | <b>93.5</b> | -                | 116405 | 133744 | <b>87.0</b> | -                |
|                                        | Degree                   | 141845 | 143273 | 99.0        | 1.67 (1.54-1.81) | 131434 | 135228 | 97.2        | 1.94 (1.85-2.03) |
|                                        | Apprenticeship           | 3601   | 3647   | 98.7        | 1.32 (0.99-1.80) | 3254   | 3367   | 96.6        | 1.61 (1.34-1.96) |
|                                        | Other                    | 10901  | 11248  | 96.9        | 0.53 (0.47-0.60) | 10052  | 10829  | <b>92.8</b> | 0.72 (0.67-0.79) |
| Recorded<br>religion                   | No religion              | 223619 | 226128 | 98.9        | Baseline         | 203422 | 210887 | 96.5        | Baseline         |
|                                        | Christianity             | 253174 | 255982 | 98.9        | 1.01 (0.96-1.07) | 232740 | 240517 | 96.8        | 1.10 (1.06-1.13) |
|                                        | Buddhism                 | 1320   | 1396   | <b>94.6</b> | 0.19 (0.16-0.25) | 1193   | 1340   | <b>89.0</b> | 0.30 (0.25-0.36) |
|                                        | Unknown                  | 134301 | 144207 | <b>93.1</b> | -                | 110499 | 127322 | <b>86.8</b> | -                |

|                                      |                          |        |        |             |                        |        |        |             |                     |
|--------------------------------------|--------------------------|--------|--------|-------------|------------------------|--------|--------|-------------|---------------------|
|                                      | Islam                    | 11280  | 11520  | 97.9        | 0.53 (0.46-0.60)       | 10441  | 11019  | <b>94.8</b> | 0.66 (0.61-0.72)    |
|                                      | Other religions          | 2842   | 2933   | 96.9        | 0.35 (0.29-0.44)       | 2575   | 2781   | <b>92.6</b> | 0.46 (0.40-0.53)    |
|                                      | Paganism                 | 869    | 910    | 95.5        | 0.24 (0.18-0.33)       | 779    | 860    | <b>90.6</b> | 0.35 (0.28-0.45)    |
|                                      | Hinduism                 | 1120   | 1131   | 99.0        | 1.14 (0.66-2.21)       | 1048   | 1095   | 95.7        | 0.82 (0.62-1.11)    |
| Had pneumococcal vaccine             | No                       | 31227  | 40106  | <b>77.9</b> | Baseline               | 26668  | 37696  | <b>70.7</b> | Baseline            |
|                                      | Yes                      | 350740 | 351302 | 99.8        | 177.45 (162.99-193.60) | 298337 | 305326 | 97.7        | 17.65 (17.09-18.24) |
|                                      | Born before introduction | 246558 | 252799 | 97.5        | -                      | 237692 | 252799 | <b>94.0</b> | -                   |
| Had three doses of pertussis vaccine | No                       | 14561  | 25600  | <b>56.9</b> | Baseline               | 9566   | 23385  | <b>40.9</b> | Baseline            |
|                                      | Yes                      | 613964 | 618607 | 99.2        | 100.25 (96.52-104.14)  | 553131 | 572436 | 96.6        | 41.39 (40.18-42.64) |
| Had two doses of rotavirus vaccine   | No                       | 9277   | 11960  | <b>77.6</b> | Baseline               | 5973   | 8584   | <b>69.6</b> | Baseline            |
|                                      | Yes                      | 142752 | 144248 | 99.0        | 27.60 (25.82-29.50)    | 95261  | 99238  | 96.0        | 10.47 (9.90-11.07)  |
|                                      | Born before introduction | 476496 | 487999 | 97.6        | -                      | 461463 | 487999 | <b>94.6</b> | -                   |
